# Supplementary material for: Leak-out spectroscopy as alternative method to rare-gas tagging for the Renner–Teller perturbed HCCH+ and DCCD+ ions
Source: Royal Society of Chemistry journal article supplement (doi:10.1039/d3cp04989b), 2023-12-19
Supplement: d3cp04989b1.pdf [file d3cp04989b1.pdf]

**Supplementary Material: Leak-out spectroscopy as alternative method to rare-gas tagging for the Renner-Teller perturbed HCCH<sup>+</sup> and DCCD<sup>+</sup> ions**

Kim Steenbakkers,<sup>1</sup> Tom van Boxtel,<sup>1</sup> Gerrit C. Groenenboom,<sup>2</sup> Oskar Asvany,<sup>3</sup> Britta Redlich,<sup>1</sup> Stephan Schlemmer,<sup>3</sup> and Sandra Brünken<sup>1, a)</sup>

<sup>1)</sup>*Radboud University, FELIX Laboratory, Institute for Molecules and Materials, Nijmegen, The Netherlands*

<sup>2)</sup>*Radboud University, Institute for Molecules and Materials, Nijmegen, The Netherlands*

<sup>3)</sup>*Physikalisches Institut der Universität zu Köln, Köln, Germany*

---

<sup>a)</sup> Author to whom correspondence should be addressed: [sandra.brueken@ru.nl](mailto:sandra.brueken@ru.nl)

## I. LINE STRENGTH DERIVATION

### A. Ro-vibronic wave functions

We use the shorthand notation for the vibronic basis functions defined in the Sec. 2.2.2 of the main text

$$|\mathbf{n}\rangle = |\Lambda\rangle|\Sigma\rangle|v_5l_5\rangle|K\rangle, \quad (1)$$

where  $K = \Lambda + l_5$  is a redundant quantum number. The projection quantum numbers refer to the molecular axis with spherical polar angles  $(\theta, \phi)$ , which we take to be the  $z$ -axis of a two-angles embedded molecular frame

$$\mathbf{R}(\phi, \theta, 0) = \mathbf{R}_z(\phi)\mathbf{R}_y(\theta), \quad (2)$$

where  $\mathbf{R}_z(\phi)$  is the  $3 \times 3$  matrix representing rotation around the  $z$ -axis over the angle  $\phi$ , and  $\mathbf{R}_y(\theta)$  is the rotation around the  $y$ -axis. The two-angle embedded parity-unadapted rovibronic basis functions are

$$|\mathbf{n}PJM\rangle = D_{M,P}^{J,*}(\phi, \theta, 0)\hat{R}(\phi, \theta, 0)|\mathbf{n}\rangle^{\text{SF}}\sqrt{\frac{[J]}{4\pi}}, \quad (3)$$

where the rotational part of the wave function is given by a Wigner  $D$ -matrix element in the  $zyz$ -Euler angle parametrization in the active convention<sup>1</sup> and  $P = K + \Sigma$ . The superscript SF on the vibronic wave function indicates that the projection quantum numbers refer to the space fixed axis and

$$\hat{R}(\phi, \theta, 0) = \hat{R}_z(\phi)\hat{R}_y(\theta) \quad (4)$$

is a rotation operator which rotates the space-fixed functions to the two-angle embedded molecular frame,

$$|\mathbf{n}\rangle = \hat{R}(\phi, \theta, 0)|\mathbf{n}\rangle^{\text{SF}}. \quad (5)$$

This rotation operator formulation is described in the appendix of Ref.<sup>2</sup>, where it is also shown how to evaluate the effect of the space inversion operator  $\hat{i}$ , which is required for parity adaption:

$$\begin{aligned} \hat{i}|\mathbf{n}PJM\rangle &= (-1)^{J-P}D_{M,-P}^{J,*}(\phi, \theta, 0)\sqrt{\frac{[J]}{4\pi}} \\ &\times \hat{R}(\phi, \theta, 0)\hat{R}_y(\pi)\hat{i}|\mathbf{n}\rangle^{\text{SF}}. \end{aligned} \quad (6)$$

For spatial coordinates the product of the rotation around the  $y$ -axis times inversion is a reflection in the  $xz$ -plane

$$\hat{R}_y(\pi)\hat{i} = \hat{\sigma}_v(xz). \quad (7)$$

For the electronic wave function we use the convention

$$\hat{\sigma}_v(xz)|\Lambda\rangle = (-1)^\Lambda|-\Lambda\rangle. \quad (8)$$

For the bend-vibrational functions defined in the next section we have

$$\hat{\sigma}_v(xz)|v_5l_5\rangle = |v_5, -l_5\rangle. \quad (9)$$

The space-fixed electron spin function is invariant under inversion. The rotation around the y-axis gives

$$\hat{R}_y(\pi)|S\Sigma\rangle^{\text{SF}} = (-1)^{S-\Sigma}|S, -\Sigma\rangle. \quad (10)$$

Putting everything together, including the redundant quantum numbers, we find

$$\begin{aligned} \hat{i}|\Lambda S \Sigma v_5 l_5 K; P J M\rangle &= (-1)^{J-S+l_5} \\ &|-\Lambda, S, -\Sigma, v_5, -l_5, -K; -P, J, M\rangle. \end{aligned} \quad (11)$$

Parity adapted functions with  $p = \pm 1$  are defined by

$$|n P J M p\rangle = \frac{1+p\hat{i}}{\sqrt{2}}|n P J M\rangle. \quad (12)$$

The normalization factor is  $1/\sqrt{2}$ , since we have  $\Lambda \neq 0$  (and also  $\Sigma \neq 0$ ) and hence none of the functions  $|n P J M\rangle$  is invariant under inversion. In the parity adapted basis we take  $\Lambda = 1$ .

We expand the wave function as

$$|\Psi_i^{JMp}\rangle = \sum_n |n J M p\rangle u_{n,i}^{(Jp)}. \quad (13)$$

## B. Line strength

The line strength is defined by

$$S(J' p' i'; J p i) = \sum_{M' m M} |\langle \Psi_{i'}^{J' M' p'} | \hat{\mu}_{5,m}^{\text{SF}} | \Psi_i^{J M p} \rangle|^2, \quad (14)$$

where the spherical components  $\hat{\mu}_m^{\text{SF}}$  of the space-fixed dipole operator are related to the Cartesian components through

$$\hat{\mu}_{5,\pm 1}^{\text{SF}} = \mp \frac{\hat{\mu}_{5,x}^{\text{SF}} \pm i \hat{\mu}_{5,y}^{\text{SF}}}{\sqrt{2}} \quad (15)$$

$$\hat{\mu}_{5,0}^{\text{SF}} = \hat{\mu}_{5,z}^{\text{SF}}. \quad (16)$$

To evaluate the dipole operator matrix elements for the parity unadapted basis,

$$\mu_{5,m} = \langle \mathbf{n}' P' J' M' | \hat{\mu}_{5,m}^{\text{SF}} | \mathbf{n} P J M \rangle \quad (17)$$

we use

$$\hat{R}^\dagger \hat{\mu}_{5,m}^{\text{SF}} \hat{R} = \sum_{k=1}^1 \hat{\mu}_{5,k}^{\text{SF}} D_{mk}^{1,*}(\phi, \theta, 0), \quad (18)$$

which gives

$$\begin{aligned} \mu_{5,m} &= \sum_{k=-1}^1 \langle \mathbf{n}' | \hat{\mu}_{5,k} | \mathbf{n} \rangle \frac{\sqrt{[J', J]}}{4\pi} \int_{-1}^1 d \cos \theta \int_0^{2\pi} d\phi \\ &\times D_{M'P'}^{(J')}(\phi, \theta, 0) D_{mk}^{1,*}(\phi, \theta, 0) D_{MP}^{J,*}(\phi, \theta, 0). \end{aligned} \quad (19)$$

The dipole matrix element is zero unless

$$P' = k + P, \quad (20)$$

so we may drop the summation and take  $k = P' - P$ . Also, this allows us to introduce a third Euler angle  $\gamma$  in the integration by inserting

$$1 = \frac{1}{2\pi} \int_0^{2\pi} e^{i(-P'+k+P)\gamma} d\gamma, \quad (21)$$

so we can use integrate the product of Wigner  $D$ -matrices analytically,

$$\begin{aligned} \mu_{5,m} &= [J', J]^{\frac{1}{2}} \langle \mathbf{n}' | \hat{\mu}_{5,k} | \mathbf{n} \rangle \\ &\times \begin{pmatrix} J' & 1 & J \\ \bar{M}' & m & M \end{pmatrix} \begin{pmatrix} J' & 1 & J \\ \bar{P}' & k & P \end{pmatrix}. \end{aligned} \quad (22)$$

Here, the bar over the projection quantum numbers  $M'$  and  $P'$  in the 3- $j$  symbol indicate “time reversal”, i.e., it flips the sign of the projection quantum number and includes a phase factor, e.g.,

$$\begin{pmatrix} J' & 1 & J \\ \bar{M}' & m & M \end{pmatrix} = (-1)^{J'-M'} \begin{pmatrix} J' & 1 & J \\ -M' & m & M \end{pmatrix}. \quad (23)$$

The dipole operator changes sign under inversion

$$\hat{i} \hat{\mu}_{5,m}^{\text{SF}} = -\hat{\mu}_{5,m}^{\text{SF}} \hat{i} \quad (24)$$

so matrix elements are only nonzero for states with opposite parity,  $p' = -p$ , so when evaluating dipole matrix elements in the parity adapted basis we may use

$$\frac{1+p'\hat{i}}{\sqrt{2}}\hat{\mu}_{5,m}^{\text{SF}}\frac{1+p\hat{i}}{\sqrt{2}} = \hat{\mu}_{5,m}^{\text{SF}} + p\hat{\mu}_{5,m}^{\text{SF}}\hat{i}. \quad (25)$$

In our approximation of the dipole operator discussed in section **IE**, matrix elements of the second term are zero, so we have

$$\begin{aligned} \langle \mathbf{n}'P'J'M'p' | \hat{\mu}_{5,m}^{\text{SF}} | \mathbf{n}PJM p \rangle = \\ \delta_{p',-p} \langle \mathbf{n}'P'J'M' | \hat{\mu}_{5,m}^{\text{SF}} | \mathbf{n}PJM \rangle. \end{aligned} \quad (26)$$

Substituting the expansion of the wave function [Eq. (13)] into the expression for the line strength [Eq. (14)], using Eq. (22) and

$$\sum_{M'mM} \left| \begin{pmatrix} J' & 1 & J \\ \bar{M}' & m & M \end{pmatrix} \right|^2 = 1, \quad (27)$$

we find for the line strength

$$\begin{aligned} S(J'p'i'lJpi) = (2J'+1)(2J+1) \\ \times \left| \sum_{\mathbf{n}'\mathbf{n}} \langle \mathbf{n}' | \hat{\mu}_{5,k} | \mathbf{n} \rangle \begin{pmatrix} J' & 1 & J \\ \bar{P}' & k & P \end{pmatrix} u_{\mathbf{n}',i'}^{(J'p')*} u_{\mathbf{n},i}^{(Jp)} \right|^2. \end{aligned} \quad (28)$$

### C. Cis-bending mode

The degenerate  $\nu_5$  cis-bending normal mode of  $\text{HCCH}^+$  follows from the symmetry of the system. We define the Cartesian coordinates of the atoms with respect to a molecule-fixed frame  $\mathbf{R}$ , such that in the equilibrium structure the molecule is along the  $z$ -axis. In this frame the  $x$ -coordinates of the hydrogen atoms are the same and we denote them by  $x_{\text{H}}$ . The  $x$ -coordinates of the carbon atoms,  $x_{\text{C}}$ , are also the same. We define the normal coordinate  $q_{5,x}$  for bending in the  $xz$ -plane such that

$$q_{5,x} = x_{\text{H}} - x_{\text{C}}, \quad (29)$$

The origin of the coordinate system is the center-of-mass of the system, so we have

$$m_{\text{H}}x_{\text{H}} + m_{\text{C}}x_{\text{C}} = 0, \quad (30)$$

where  $m_H$  and  $m_C$  are the atomic masses for H and C, respectively. The Cartesian coordinates as function of the normal coordinates  $q_{5,x}$  are

$$x_H = \frac{m_C}{m_C + m_H} q_{5,x} \quad (31)$$

$$x_C = -\frac{m_H}{m_C} \frac{m_C}{m_C + m_H} q_{5,x}. \quad (32)$$

The Hamiltonian for vibration in the  $xz$ -plane in this coordinate in the harmonic approximation is

$$\hat{H}_{5,x} = -\frac{\hbar^2}{2\mu_5} \frac{\partial^2}{\partial q_{5,x}^2} + \frac{1}{2} k_5 q_{5,x}^2, \quad (33)$$

where the reduced mass is given by

$$\mu_5 = 2 \frac{m_C m_H}{m_C + m_H}. \quad (34)$$

The harmonic force constant  $k_5$  is related to the harmonic frequency through

$$\omega_5 = \sqrt{\frac{k_5}{\mu_5}}. \quad (35)$$

We introduce the dimensionless normal coordinate

$$\hat{Q}_{5,x} = q_{5,x} \sqrt{\frac{\mu_5 \omega_5}{\hbar}} \quad (36)$$

such that the Hamiltonian becomes

$$\hat{H}_{5,x} = \frac{1}{2} \hbar \omega_5 (\hat{P}_{5,x}^2 + \hat{Q}_{5,x}^2), \quad (37)$$

where  $\hat{P}_{5,x}$  is the momentum conjugate to  $\hat{Q}_{5,x}$  and the commutator is

$$[\hat{P}_{5,x}, \hat{Q}_{5,x}] = 1. \quad (38)$$

The annihilation operator  $\hat{a}_{5,x}$  is defined by

$$\hat{a}_{5,x} = \frac{1}{\sqrt{2}} (\hat{Q}_{5,x} + i\hat{P}_{5,x}) \quad (39)$$

and the creation operator  $\hat{a}_{5,x}^\dagger$  is its Hermitian conjugate. With the analogous definitions for bending in the  $yz$ -plane, the two-dimensional harmonic oscillator Hamiltonian for the  $\nu_5$  bending mode is given by

$$\hat{H} = \hat{H}_x + \hat{H}_y = \hbar \omega_5 (\hat{N} + 1), \quad (40)$$

where the number operator

$$\hat{N} = \hat{N}_{5,x} + \hat{N}_{5,y} \quad (41)$$

with the number operators for  $v_{5,x}$  and  $v_{5,y}$  defined by

$$\hat{N}_x = \hat{a}_{5,x}^\dagger \hat{a}_{5,x} \quad (42)$$

$$\hat{N}_y = \hat{a}_{5,y}^\dagger \hat{a}_{5,y}. \quad (43)$$

The vibrational angular momentum operator is given by

$$\hat{L}_5 = \hat{Q}_{5,x} \hat{P}_{5,y} - \hat{Q}_{5,y} \hat{P}_{5,x}. \quad (44)$$

Working with vibrational wave functions with well-defined vibrational angular momentum is particularly convenient for Renner-Teller problems, so we switch to complex coordinates and their conjugate momenta,

$$\hat{Q}_{5,\pm} = \frac{1}{\sqrt{2}}(\hat{Q}_{5,x} \pm i\hat{Q}_{5,y}) \quad (45)$$

$$\hat{P}_{5,\pm} = \frac{1}{\sqrt{2}}(\hat{P}_{5,x} \pm i\hat{P}_{5,y}). \quad (46)$$

This constitutes a unitary transformation of the coordinates so the commutation relations are invariant, i.e.,

$$[\hat{P}_{5,\pm}, \hat{Q}_{5,\pm}] = 1, \quad (47)$$

while all other commutators of these complex operators are zero. The corresponding creation operators are given by

$$\hat{a}_{5,\pm}^\dagger = \frac{1}{\sqrt{2}}(\hat{a}_{5,x}^\dagger \pm i\hat{a}_{5,y}^\dagger) \quad (48)$$

$$\hat{a}_{5,\pm} = \frac{1}{\sqrt{2}}(\hat{a}_{5,x} \mp i\hat{a}_{5,y}). \quad (49)$$

The commutators of these creation and annihilation operators are all zero, except for

$$[\hat{a}_{5,\pm}, \hat{a}_{5,\pm}^\dagger] = 1. \quad (50)$$

The complex coordinates can be expressed in these operators as

$$\hat{Q}_{5,\pm} = \hat{a}_{5,\mp} + \hat{a}_{5,\pm}^\dagger \quad (51)$$

and number and vibrational angular momentum operators can now be written as

$$\hat{N}_5 = \hat{N}_{5,+} + \hat{N}_{5,-} \quad (52)$$

$$\hat{L}_5 = \hat{N}_{5,+} - \hat{N}_{5,-} \quad (53)$$

with

$$\hat{N}_{5,\pm} = \hat{a}_{5,\pm}^\dagger \hat{a}_{5,\pm}. \quad (54)$$

These operators commute,  $[\hat{N}_{5,+}, \hat{N}_{5,-}] = 0$ , so we can define two-dimensional harmonic oscillator eigenfunctions

$$|n_{5,+}n_{5,-}\rangle^{+,-} = \frac{1}{\sqrt{n_{5,+}!n_{5,-}!}} (\hat{a}_{5,+}^\dagger)^{n_{5,+}} (\hat{a}_{5,-}^\dagger)^{n_{5,-}} |0,0\rangle, \quad (55)$$

where the normalized, two-dimensional harmonic oscillator ground state in canonical coordinates is given by

$$\langle Q_{5,x}, Q_{5,y} | 0,0 \rangle = \sqrt{\frac{\mu_5 \omega_5}{\pi \hbar}} \exp\left(-\frac{\mu_5 \omega_5}{2\hbar} Q_5^2\right), \quad (56)$$

with  $Q_5^2 = Q_{5,x}^2 + Q_{5,y}^2$ . For these  $+, -$  eigenfunctions we have

$$\hat{N}_5 |n_{5,+}n_{5,-}\rangle^{+,-} = (n_{5,+} + n_{5,-}) |n_{5,+}n_{5,-}\rangle^{+,-} \quad (57)$$

$$\hat{L}_5 |n_{5,+}n_{5,-}\rangle^{+,-} = (n_{5,+} - n_{5,-}) |n_{5,+}n_{5,-}\rangle^{+,-}. \quad (58)$$

Hence, we can define the  $|v_5 l_5\rangle$  basis functions, with quantum numbers

$$v_5 = n_{5,+} + n_{5,-} \quad (59)$$

$$l_5 = n_{5,+} - n_{5,-} \quad (60)$$

by

$$|v_5 l_5\rangle = \left| \frac{v_5 + l_5}{2}, \frac{v_5 - l_5}{2} \right\rangle^{+,-}, \quad (61)$$

so that we have

$$\hat{N}_5 |v_5 l_5\rangle = v_5 |v_5 l_5\rangle \quad (62)$$

$$\hat{L}_5 |v_5 l_5\rangle = l_5 |v_5 l_5\rangle. \quad (63)$$

The action of the ladder operators follow from

$$\hat{a}_{5,+}^\dagger |n_{5,+}n_{5,-}\rangle^{+,-} = \sqrt{n_{5,+} + 1} |n_{5,+} + 1, n_{5,-}\rangle^{+,-} \quad (64)$$

$$\hat{a}_{5,+} |n_{5,+}n_{5,-}\rangle^{+,-} = \sqrt{n_{5,+}} |n_{5,+} - 1, n_{5,-}\rangle^{+,-} \quad (65)$$



and  $\hat{a}_{5,-}$  its Hermitian conjugate act on  $n_{5,-}$  analogously. Finally we can evaluate the matrix elements of Eq. (75). For example, for  $k = 1$ ,  $l'_5 = l_5 + 1$ , and  $v'_5 = v_5 + 1$  we find

$$\begin{aligned} \langle v_5 + 1, l_5 + 1 | \hat{Q}_{5,+} | v_5, l_5 \rangle \\ = \langle v_5 + 1, l_5 + 1 | \hat{a}_{5,-} + \hat{a}_{5,+}^\dagger | v_5, l_5 \rangle \end{aligned} \quad (66)$$

$$= \langle v_5 + 1, l_5 + 1 | \hat{a}_{5,+}^\dagger | v_5, l_5 \rangle \quad (67)$$

$$= \sqrt{n_{5,+} + 1} = \sqrt{\frac{v_5 + l_5}{2} + 1}. \quad (68)$$

These matrix elements agree with the expressions in Appendix E.2 in Ref.<sup>3</sup>.

#### D. Reflection symmetry

Reflection in the molecule-fixed  $xz$  coordinates gives

$$\hat{\sigma}_v(xz) \hat{Q}_{5,x} \hat{\sigma}_v^\dagger(xz) = \hat{Q}_{5,x} \quad (69)$$

$$\hat{\sigma}_v(xz) \hat{Q}_{5,y} \hat{\sigma}_v^\dagger(xz) = -\hat{Q}_{5,y}. \quad (70)$$

For the creation operators this gives

$$\hat{\sigma}_v(xz) \hat{a}_{5,\pm}^\dagger \hat{\sigma}_v^\dagger(xz) = \hat{a}_{5,\mp}^\dagger. \quad (71)$$

Applying the reflection operators to the  $+, -$  basis [Eq. (55)] gives

$$\hat{\sigma}_v(xz) |n_{5,+} n_{5,-}\rangle^{+,-} = |n_{5,-} n_{5,+}\rangle^{+,-}, \quad (72)$$

so we also have

$$\hat{\sigma}_v(xz) |v_5 l_5\rangle = |v_5, -l_5\rangle. \quad (73)$$

#### E. Dipole matrix elements

We approximate the dipole operator by only including terms linear in the normal coordinate,

$$\hat{\mu}_{5,\pm 1} = \mp \mu_5^\perp \hat{Q}_{5,\pm} \quad (74)$$

, where  $\mu_5^\perp$  is the perpendicular dipole moment, and we neglect contributions nondiagonal in  $\Lambda$ .

The dipole operator does not act on the electron spin, so we have

$$\langle \mathbf{n}' | \hat{\mu}_{5,k} | \mathbf{n} \rangle = \mp \mu_5^\perp \delta_{\Sigma'\Sigma} \delta_{\Lambda'\Lambda} \langle v'_5 l'_5 | \hat{Q}_{5,k} | v_5 l_5 \rangle, \quad (75)$$

where the matrix elements of the normal coordinate are given in the previous section.

In our basis  $\Lambda = 1$  and our approximate dipole operator does not act on the electronic coordinate  $\Lambda$  we dropped the second term in Eq. (25).

## II. TABLES AND FIGURES

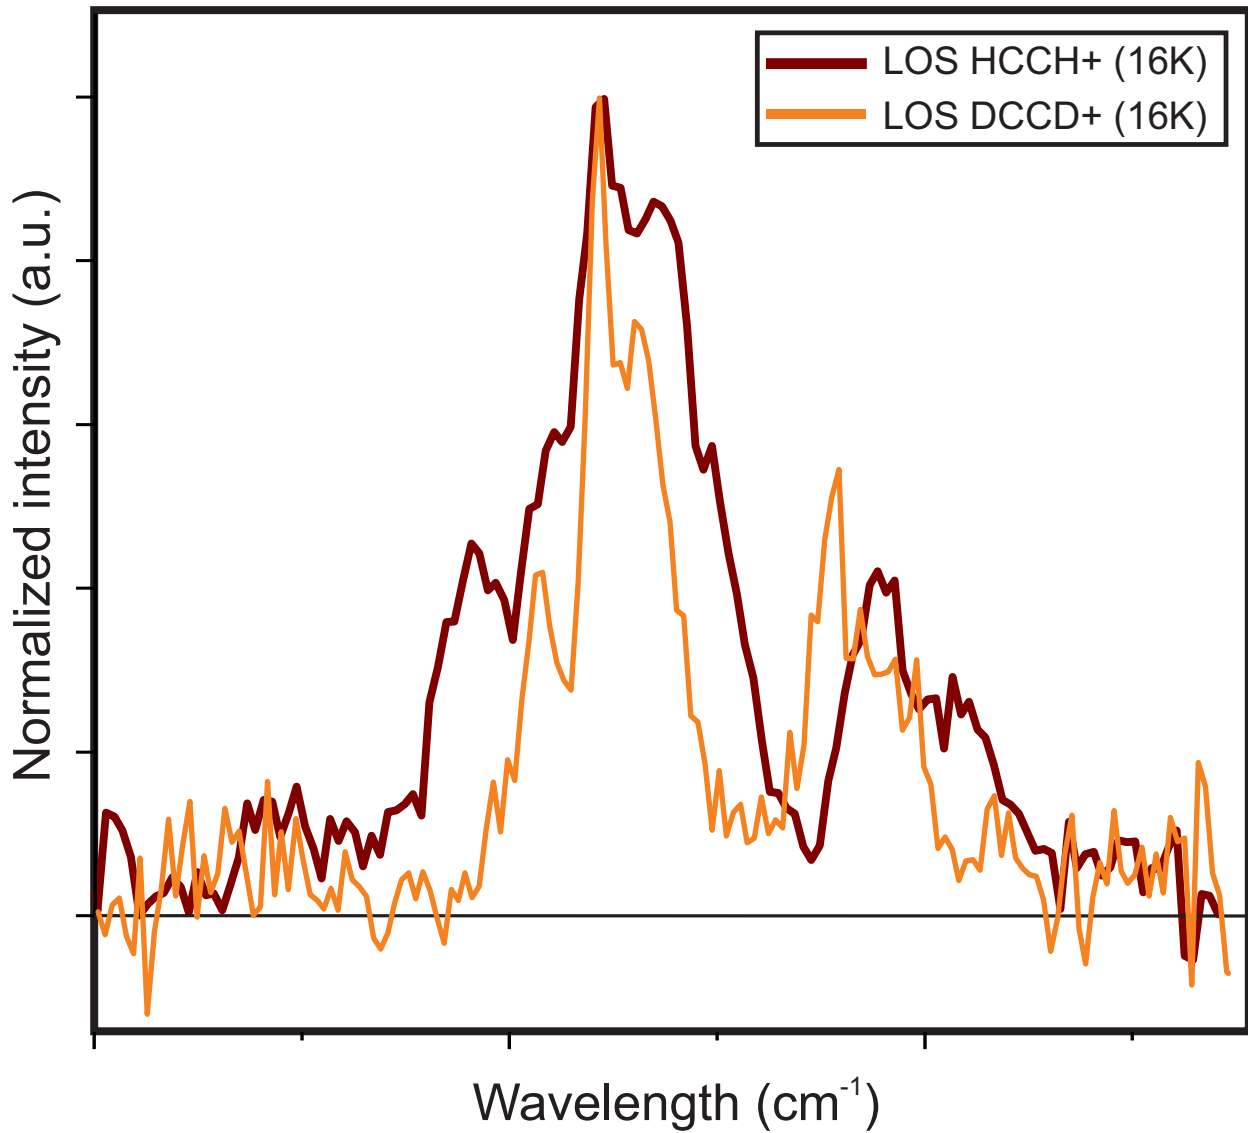

FIG. 1: Overlaid and scaled DCCD<sup>+</sup> and HCCH<sup>+</sup> spectra recorded by means of LOS

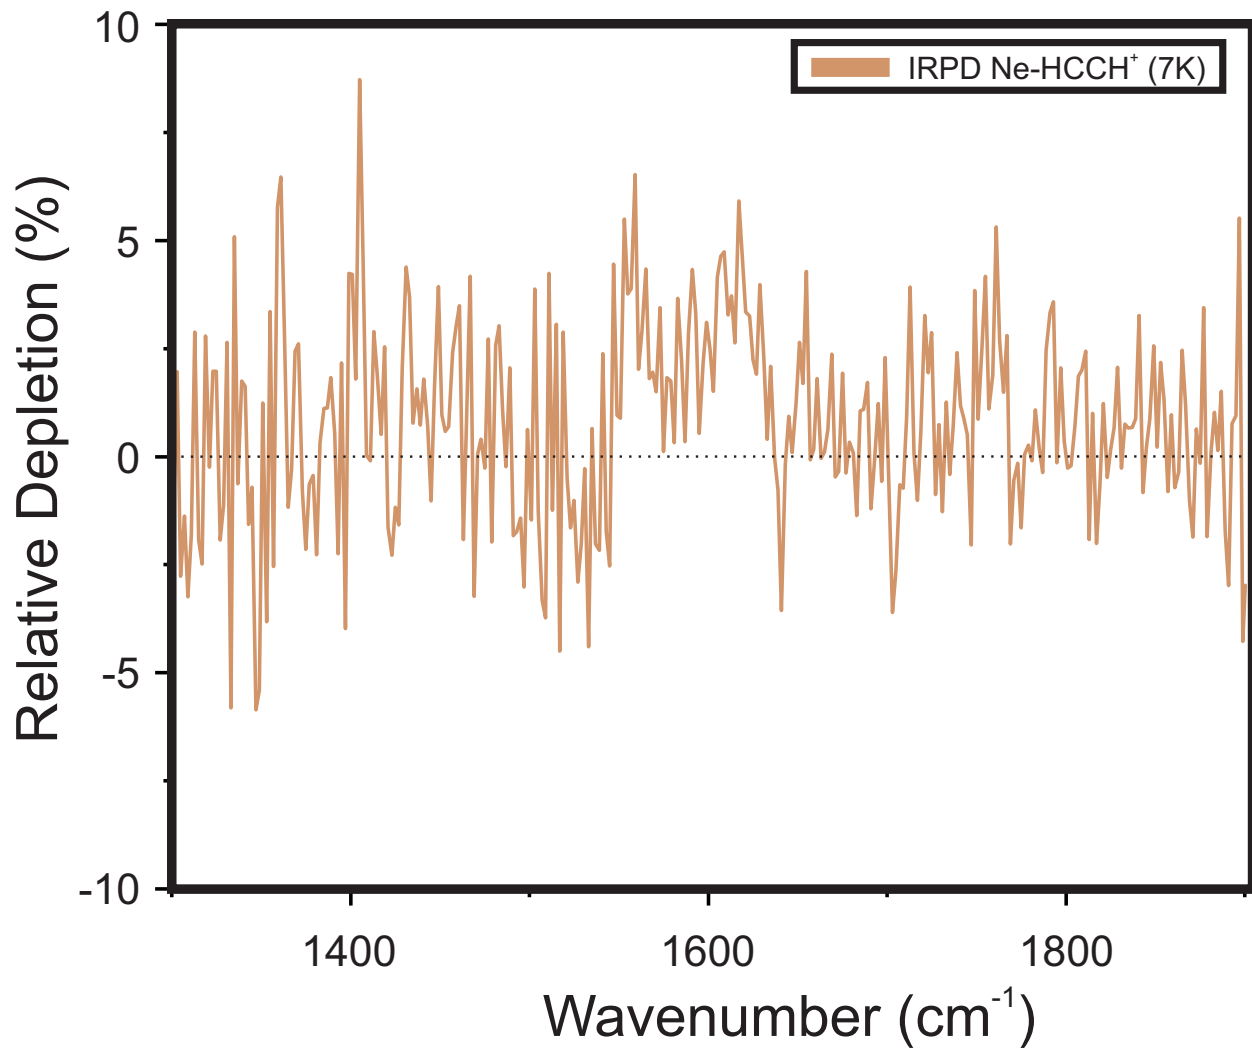

FIG. 2: Vibrational IRPD spectrum of the Ne–HCCH<sup>+</sup> recorded in the C–C stretching region.

TABLE I: Calculated frequencies and intensities based on fitted spectroscopic parameters of <sup>4</sup> of the Sigma states

| Freq<br>(cm <sup>-1</sup> ) | Int.<br>(a.u.) | 38K Int.<br>(a.u.) | 90K J' | J''  |
|-----------------------------|----------------|--------------------|--------|------|
| 639.8                       | 0.0023         | 0.010              | 6.5    | 7.5  |
| 643.4                       | 0.0035         | 0.011              | 5.5    | 6.5  |
| 647.0                       | 0.0047         | 0.011              | 4.5    | 5.5  |
| 650.7                       | 6.4E-4         | 0.012              | 10.5   | 10.5 |

continued on next page

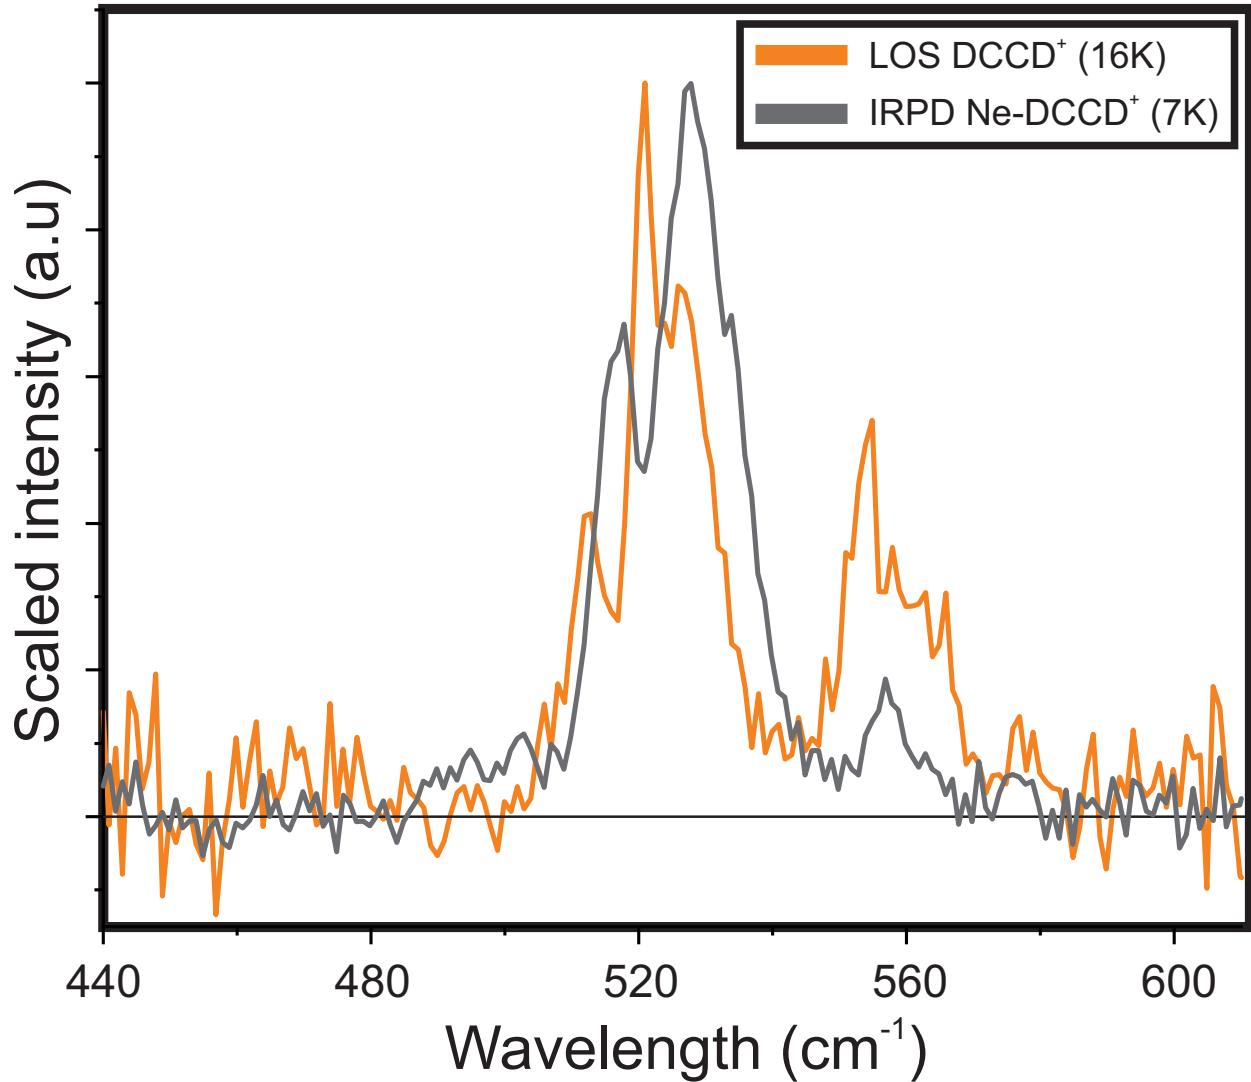

FIG. 3: Comparison of the infrared spectra of the bare  $\text{DCCD}^+$  ion taken with LOS and of  $\text{Ne-DCCD}^+$  recorded by means of IRPD.

TABLE I – continued from previous page

| Freq<br>( $\text{cm}^{-1}$ ) | Int.<br>(a.u.) | 38K Int.<br>(a.u.) | 90K $J'$ | $J''$ |
|------------------------------|----------------|--------------------|----------|-------|
| 652.3                        | 0.0014         | 0.015              | 9.5      | 9.5   |
| 653.9                        | 0.0026         | 0.019              | 8.5      | 8.5   |
| 655.4                        | 0.0046         | 0.021              | 7.5      | 7.5   |
| 656.8                        | 0.0071         | 0.022              | 6.5      | 6.5   |

continued on next page

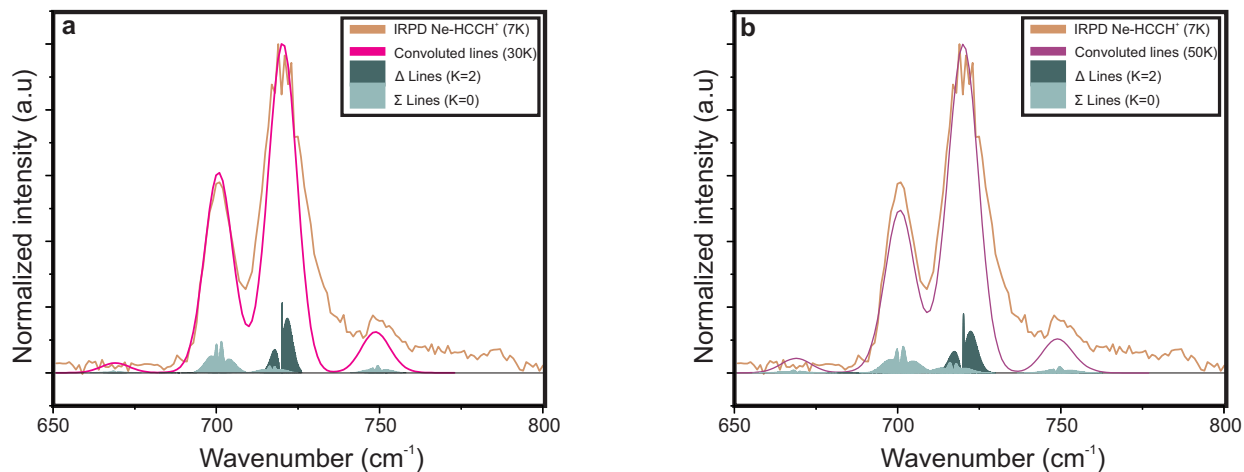

FIG. 4: Infrared spectrum of  $\text{Ne-HCCH}^+$  overlaid with the theoretical spectra simulated at 30K (a) and 50K (b).

TABLE I – continued from previous page

| Freq<br>( $\text{cm}^{-1}$ ) | Int.<br>(a.u.) | 38K Int.<br>(a.u.) | 90K J' | J''  |
|------------------------------|----------------|--------------------|--------|------|
| 658.2                        | 0.0098         | 0.022              | 5.5    | 5.5  |
| 659.5                        | 0.012          | 0.021              | 4.5    | 4.5  |
| 660.8                        | 0.013          | 0.018              | 3.5    | 3.5  |
| 662.0                        | 0.011          | 0.013              | 2.5    | 2.5  |
| 670.7                        | 0.0061         | 0.011              | 5.5    | 4.5  |
| 671.6                        | 0.0050         | 0.011              | 6.5    | 5.5  |
| 672.4                        | 0.0030         | 0.014              | 8.5    | 9.5  |
| 672.4                        | 0.0036         | 0.011              | 7.5    | 6.5  |
| 673.2                        | 0.0023         | 0.011              | 8.5    | 7.5  |
| 675.0                        | 0.0063         | 0.019              | 7.5    | 8.5  |
| 677.6                        | 0.012          | 0.025              | 6.5    | 7.5  |
| 680.3                        | 0.022          | 0.031              | 5.5    | 6.5  |
| 683.0                        | 0.034          | 0.036              | 4.5    | 5.5  |
| 684.3                        | 0.0011         | 0.013              | 8.5    | 9.5  |
| 684.3                        | 4.7E-4         | 0.011              | 11.5   | 12.5 |

continued on next page

**TABLE I – continued from previous page**

| Freq<br>(cm <sup>-1</sup> ) | Int.<br>(a.u.) | 38K Int.<br>(a.u.) | 90K J' | J''  |
|-----------------------------|----------------|--------------------|--------|------|
| 685.4                       | 0.0012         | 0.016              | 10.5   | 11.5 |
| 685.7                       | 0.050          | 0.041              | 3.5    | 4.5  |
| 686.4                       | 0.0029         | 0.022              | 9.5    | 10.5 |
| 687.4                       | 0.0063         | 0.030              | 8.5    | 9.5  |
| 687.7                       | 0.0023         | 0.016              | 7.5    | 8.5  |
| 688.4                       | 0.012          | 0.037              | 7.5    | 8.5  |
| 688.5                       | 0.065          | 0.043              | 2.5    | 3.5  |
| 689.4                       | 0.022          | 0.045              | 6.5    | 7.5  |
| 690.5                       | 0.036          | 0.051              | 5.5    | 6.5  |
| 691.1                       | 0.0042         | 0.019              | 6.5    | 7.5  |
| 691.4                       | 0.077          | 0.043              | 1.5    | 2.5  |
| 691.5                       | 0.053          | 0.056              | 4.5    | 5.5  |
| 691.7                       | 8.5E-4         | 0.011              | 11.5   | 11.5 |
| 692.0                       | 0.0021         | 0.016              | 10.5   | 10.5 |
| 692.3                       | 0.0048         | 0.023              | 9.5    | 9.5  |
| 692.6                       | 0.071          | 0.058              | 3.5    | 4.5  |
| 692.7                       | 0.010          | 0.030              | 8.5    | 8.5  |
| 693.2                       | 0.019          | 0.038              | 7.5    | 7.5  |
| 693.6                       | 0.033          | 0.046              | 6.5    | 6.5  |
| 693.7                       | 0.085          | 0.056              | 2.5    | 3.5  |
| 694.2                       | 0.050          | 0.053              | 5.5    | 5.5  |
| 694.3                       | 0.083          | 0.041              | 0.5    | 1.5  |
| 694.4                       | 0.0068         | 0.022              | 5.5    | 6.5  |
| 694.7                       | 0.069          | 0.056              | 4.5    | 4.5  |
| 694.9                       | 0.092          | 0.052              | 1.5    | 2.5  |
| 695.3                       | 0.083          | 0.054              | 3.5    | 3.5  |

continued on next page

**TABLE I – continued from previous page**

| Freq<br>(cm <sup>-1</sup> ) | Int.<br>(a.u.) | 38K Int.<br>(a.u.) | 90K J' | J''  |
|-----------------------------|----------------|--------------------|--------|------|
| 696.0                       | 0.084          | 0.047              | 2.5    | 2.5  |
| 696.0                       | 0.091          | 0.045              | 0.5    | 1.5  |
| 696.7                       | 0.063          | 0.031              | 1.5    | 1.5  |
| 697.8                       | 0.0099         | 0.023              | 4.5    | 5.5  |
| 700.2                       | 0.076          | 0.038              | 1.5    | 1.5  |
| 701.1                       | 0.013          | 0.022              | 3.5    | 4.5  |
| 701.2                       | 0.11           | 0.061              | 2.5    | 2.5  |
| 702.2                       | 0.12           | 0.078              | 3.5    | 3.5  |
| 702.4                       | 4.2E-4         | 0.014              | 11.5   | 11.5 |
| 702.8                       | 0.025          | 0.014              | 3.5    | 2.5  |
| 703.3                       | 0.11           | 0.087              | 4.5    | 4.5  |
| 703.5                       | 0.0010         | 0.020              | 10.5   | 10.5 |
| 704.3                       | 0.027          | 0.018              | 4.5    | 3.5  |
| 704.4                       | 0.085          | 0.089              | 5.5    | 5.5  |
| 704.4                       | 0.014          | 0.020              | 2.5    | 3.5  |
| 704.7                       | 0.0024         | 0.027              | 9.5    | 9.5  |
| 704.7                       | 0.0036         | 0.012              | 5.5    | 6.5  |
| 705.5                       | 0.059          | 0.085              | 6.5    | 6.5  |
| 705.8                       | 0.0048         | 0.034              | 8.5    | 8.5  |
| 705.9                       | 0.024          | 0.020              | 5.5    | 4.5  |
| 706.4                       | 0.0057         | 0.013              | 4.5    | 5.5  |
| 706.6                       | 0.037          | 0.076              | 7.5    | 7.5  |
| 706.9                       | 0.0088         | 0.041              | 7.5    | 7.5  |
| 707.5                       | 0.019          | 0.020              | 6.5    | 5.5  |
| 707.7                       | 0.013          | 0.015              | 1.5    | 2.5  |
| 707.8                       | 0.021          | 0.064              | 8.5    | 8.5  |

continued on next page

**TABLE I – continued from previous page**

| Freq<br>(cm <sup>-1</sup> ) | Int.<br>(a.u.) | 38K Int.<br>(a.u.) | 90K J' | J''  |
|-----------------------------|----------------|--------------------|--------|------|
| 708.0                       | 0.0080         | 0.014              | 3.5    | 4.5  |
| 708.1                       | 0.015          | 0.046              | 6.5    | 6.5  |
| 708.9                       | 0.011          | 0.051              | 9.5    | 9.5  |
| 709.2                       | 0.022          | 0.050              | 5.5    | 5.5  |
| 709.2                       | 0.012          | 0.018              | 7.5    | 6.5  |
| 709.6                       | 0.0096         | 0.013              | 2.5    | 3.5  |
| 709.7                       | 0.036          | 0.020              | 3.5    | 2.5  |
| 710.1                       | 0.0051         | 0.039              | 10.5   | 10.5 |
| 710.3                       | 0.028          | 0.050              | 4.5    | 4.5  |
| 710.9                       | 0.0075         | 0.015              | 8.5    | 7.5  |
| 711.2                       | 0.0097         | 0.011              | 1.5    | 2.5  |
| 711.2                       | 0.0022         | 0.029              | 11.5   | 11.5 |
| 711.4                       | 0.033          | 0.046              | 3.5    | 3.5  |
| 712.3                       | 8.3E-4         | 0.020              | 12.5   | 12.5 |
| 712.4                       | 0.033          | 0.039              | 2.5    | 2.5  |
| 712.7                       | 0.0040         | 0.012              | 9.5    | 8.5  |
| 712.9                       | 0.043          | 0.028              | 4.5    | 3.5  |
| 713.3                       | 2.9E-4         | 0.013              | 13.5   | 13.5 |
| 713.4                       | 0.027          | 0.028              | 1.5    | 1.5  |
| 714.3                       | 0.018          | 0.018              | 0.5    | 0.5  |
| 716.1                       | 0.018          | 0.017              | 0.5    | 0.5  |
| 716.1                       | 0.041          | 0.034              | 5.5    | 4.5  |
| 716.9                       | 0.023          | 0.024              | 1.5    | 1.5  |
| 717.6                       | 0.026          | 0.030              | 2.5    | 2.5  |
| 718.1                       | 0.015          | 0.016              | 2.5    | 1.5  |
| 718.2                       | 0.023          | 0.033              | 3.5    | 3.5  |

continued on next page



**TABLE I – continued from previous page**

| Freq<br>(cm <sup>-1</sup> ) | Int.<br>(a.u.) | 38K Int.<br>(a.u.) | 90K J' | J''  |
|-----------------------------|----------------|--------------------|--------|------|
| 718.9                       | 0.019          | 0.033              | 4.5    | 4.5  |
| 719.3                       | 0.018          | 0.021              | 3.5    | 2.5  |
| 719.4                       | 0.034          | 0.036              | 6.5    | 5.5  |
| 719.4                       | 0.013          | 0.030              | 5.5    | 5.5  |
| 720.0                       | 0.0081         | 0.026              | 6.5    | 6.5  |
| 720.4                       | 0.0045         | 0.021              | 7.5    | 7.5  |
| 720.6                       | 0.018          | 0.025              | 4.5    | 3.5  |
| 720.9                       | 0.0023         | 0.016              | 8.5    | 8.5  |
| 721.2                       | 0.0011         | 0.012              | 9.5    | 9.5  |
| 721.7                       | 0.015          | 0.027              | 5.5    | 4.5  |
| 722.7                       | 0.025          | 0.035              | 7.5    | 6.5  |
| 722.9                       | 0.011          | 0.026              | 6.5    | 5.5  |
| 723.3                       | 0.013          | 0.014              | 2.5    | 1.5  |
| 724.0                       | 0.0077         | 0.024              | 7.5    | 6.5  |
| 725.1                       | 0.0046         | 0.021              | 8.5    | 7.5  |
| 726.0                       | 0.016          | 0.032              | 8.5    | 7.5  |
| 726.2                       | 0.0025         | 0.018              | 9.5    | 8.5  |
| 726.2                       | 0.014          | 0.017              | 3.5    | 2.5  |
| 727.3                       | 0.0012         | 0.014              | 10.5   | 9.5  |
| 728.4                       | 5.4E-4         | 0.010              | 11.5   | 10.5 |
| 729.1                       | 0.013          | 0.018              | 4.5    | 3.5  |
| 729.3                       | 0.0092         | 0.028              | 9.5    | 8.5  |
| 731.9                       | 0.010          | 0.018              | 5.5    | 4.5  |
| 732.6                       | 0.0048         | 0.022              | 10.5   | 9.5  |
| 734.7                       | 0.0071         | 0.016              | 6.5    | 5.5  |
| 735.9                       | 0.0022         | 0.017              | 11.5   | 10.5 |

continued on next page

**TABLE I – continued from previous page**

| Freq<br>(cm <sup>-1</sup> ) | Int.<br>(a.u.) | 38K Int.<br>(a.u.) | 90K J' | J''  |
|-----------------------------|----------------|--------------------|--------|------|
| 737.5                       | 0.0044         | 0.014              | 7.5    | 6.5  |
| 738.8                       | 0.0015         | 0.012              | 9.5    | 10.5 |
| 739.1                       | 9.6E-4         | 0.013              | 12.5   | 11.5 |
| 739.4                       | 0.0031         | 0.015              | 8.5    | 9.5  |
| 740.0                       | 0.0058         | 0.017              | 7.5    | 8.5  |
| 740.1                       | 0.0024         | 0.011              | 8.5    | 7.5  |
| 740.7                       | 0.0097         | 0.020              | 6.5    | 7.5  |
| 741.5                       | 0.015          | 0.021              | 5.5    | 6.5  |
| 742.3                       | 0.020          | 0.021              | 4.5    | 5.5  |
| 743.2                       | 0.025          | 0.020              | 3.5    | 4.5  |
| 744.2                       | 0.027          | 0.018              | 2.5    | 3.5  |
| 745.2                       | 0.026          | 0.015              | 1.5    | 2.5  |
| 746.4                       | 0.023          | 0.011              | 0.5    | 1.5  |
| 750.6                       | 0.021          | 0.011              | 1.5    | 1.5  |
| 751.6                       | 0.035          | 0.019              | 2.5    | 2.5  |
| 752.8                       | 0.041          | 0.027              | 3.5    | 3.5  |
| 754.0                       | 0.040          | 0.033              | 4.5    | 4.5  |
| 755.4                       | 0.035          | 0.036              | 5.5    | 5.5  |
| 756.8                       | 0.026          | 0.037              | 6.5    | 6.5  |
| 758.2                       | 0.018          | 0.035              | 7.5    | 7.5  |
| 759.7                       | 0.011          | 0.032              | 8.5    | 8.5  |
| 761.3                       | 0.0058         | 0.027              | 9.5    | 9.5  |
| 762.9                       | 0.0029         | 0.022              | 10.5   | 10.5 |
| 763.7                       | 0.016          | 0.011              | 4.5    | 3.5  |
| 764.6                       | 0.0013         | 0.017              | 11.5   | 11.5 |
| 766.3                       | 5.2E-4         | 0.012              | 12.5   | 12.5 |

continued on next page

**TABLE I – continued from previous page**

| Freq<br>(cm <sup>-1</sup> ) | Int.<br>(a.u.) | 38K Int.<br>(a.u.) | 90K J' | J''  |
|-----------------------------|----------------|--------------------|--------|------|
| 767.1                       | 0.017          | 0.014              | 5.5    | 4.5  |
| 770.7                       | 0.015          | 0.016              | 6.5    | 5.5  |
| 774.3                       | 0.012          | 0.017              | 7.5    | 6.5  |
| 777.9                       | 0.0080         | 0.016              | 8.5    | 7.5  |
| 781.7                       | 0.0049         | 0.015              | 9.5    | 8.5  |
| 785.4                       | 0.0027         | 0.013              | 10.5   | 9.5  |
| 789.3                       | 0.0013         | 0.010              | 11.5   | 10.5 |

TABLE II: Calculated frequencies and intensities based on fitted spectroscopic parameters of <sup>4</sup> of the Delta states

| Freq<br>(cm <sup>-1</sup> ) | Int.<br>(a.u.) | 38K Int.<br>(a.u.) | 90K J' | J''  |
|-----------------------------|----------------|--------------------|--------|------|
| 667.8                       | 3.1E-4         | 0.010              | 11.5   | 11.5 |
| 669.1                       | 6.8E-4         | 0.013              | 10.5   | 10.5 |
| 670.3                       | 0.0013         | 0.015              | 9.5    | 9.5  |
| 671.5                       | 0.0023         | 0.016              | 8.5    | 8.5  |
| 672.5                       | 0.0035         | 0.016              | 7.5    | 7.5  |
| 673.5                       | 0.0045         | 0.014              | 6.5    | 6.5  |
| 674.3                       | 0.0050         | 0.012              | 5.5    | 5.5  |
| 685.7                       | 9.1E-4         | 0.012              | 10.5   | 11.5 |
| 687.8                       | 0.0022         | 0.017              | 9.5    | 10.5 |
| 688.2                       | 5.9E-4         | 0.011              | 9.5    | 10.5 |
| 688.2                       | 0.0051         | 0.012              | 6.5    | 5.5  |
| 689.6                       | 0.0041         | 0.013              | 7.5    | 6.5  |
| 690.0                       | 0.0046         | 0.022              | 8.5    | 9.5  |
| 690.5                       | 0.0014         | 0.015              | 8.5    | 9.5  |

continued on next page

**TABLE II – continued from previous page**

| Freq<br>(cm <sup>-1</sup> ) | Rel. Int 38K<br>(a.u.) | Rel. Int 90K<br>(a.u.) | J'   | J''  |
|-----------------------------|------------------------|------------------------|------|------|
| 690.8                       | 0.0029                 | 0.013                  | 8.5  | 7.5  |
| 691.9                       | 0.0018                 | 0.013                  | 9.5  | 8.5  |
| 692.1                       | 0.0089                 | 0.027                  | 7.5  | 8.5  |
| 692.8                       | 0.0028                 | 0.020                  | 7.5  | 8.5  |
| 692.9                       | 1.0E-3                 | 0.011                  | 10.5 | 9.5  |
| 694.2                       | 0.015                  | 0.030                  | 6.5  | 7.5  |
| 695.1                       | 0.0052                 | 0.024                  | 6.5  | 7.5  |
| 696.4                       | 0.022                  | 0.032                  | 5.5  | 6.5  |
| 697.3                       | 0.0086                 | 0.027                  | 5.5  | 6.5  |
| 698.5                       | 0.028                  | 0.029                  | 4.5  | 5.5  |
| 699.6                       | 0.012                  | 0.028                  | 4.5  | 5.5  |
| 700.6                       | 0.028                  | 0.023                  | 3.5  | 4.5  |
| 701.9                       | 0.015                  | 0.026                  | 3.5  | 4.5  |
| 702.7                       | 0.018                  | 0.012                  | 2.5  | 3.5  |
| 704.2                       | 0.015                  | 0.021                  | 2.5  | 3.5  |
| 706.5                       | 0.0095                 | 0.011                  | 1.5  | 2.5  |
| 710.2                       | 0.14                   | 0.081                  | 2.5  | 2.5  |
| 710.2                       | 0.19                   | 0.12                   | 3.5  | 3.5  |
| 710.2                       | 0.18                   | 0.14                   | 4.5  | 4.5  |
| 710.3                       | 0.14                   | 0.14                   | 5.5  | 5.5  |
| 710.3                       | 0.093                  | 0.13                   | 6.5  | 6.5  |
| 710.3                       | 0.056                  | 0.11                   | 7.5  | 7.5  |
| 710.3                       | 0.030                  | 0.092                  | 8.5  | 8.5  |
| 710.4                       | 0.015                  | 0.070                  | 9.5  | 9.5  |
| 710.4                       | 0.0066                 | 0.051                  | 10.5 | 10.5 |
| 710.4                       | 0.0027                 | 0.036                  | 11.5 | 11.5 |

continued on next page

**TABLE II – continued from previous page**

| Freq<br>(cm <sup>-1</sup> ) | Rel. Int 38K<br>(a.u.) | Rel. Int 90K<br>(a.u.) | J'   | J''  |
|-----------------------------|------------------------|------------------------|------|------|
| 710.4                       | 9.9E-4                 | 0.024                  | 12.5 | 12.5 |
| 710.4                       | 3.4E-4                 | 0.015                  | 13.5 | 13.5 |
| 712.0                       | 1.9E-4                 | 0.012                  | 12.5 | 12.5 |
| 712.0                       | 5.5E-4                 | 0.018                  | 11.5 | 11.5 |
| 712.0                       | 0.0014                 | 0.027                  | 10.5 | 10.5 |
| 712.0                       | 0.0034                 | 0.038                  | 9.5  | 9.5  |
| 712.1                       | 0.0073                 | 0.051                  | 8.5  | 8.5  |
| 712.1                       | 0.014                  | 0.066                  | 7.5  | 7.5  |
| 712.1                       | 0.025                  | 0.079                  | 6.5  | 6.5  |
| 712.1                       | 0.039                  | 0.089                  | 5.5  | 5.5  |
| 712.1                       | 0.053                  | 0.094                  | 4.5  | 4.5  |
| 712.2                       | 0.064                  | 0.090                  | 3.5  | 3.5  |
| 712.2                       | 0.064                  | 0.075                  | 2.5  | 2.5  |
| 712.2                       | 0.047                  | 0.049                  | 1.5  | 1.5  |
| 715.5                       | 0.42                   | 0.21                   | 2.5  | 1.5  |
| 715.6                       | 0.067                  | 0.065                  | 1.5  | 0.5  |
| 717.7                       | 0.36                   | 0.20                   | 3.5  | 2.5  |
| 717.9                       | 0.070                  | 0.073                  | 2.5  | 1.5  |
| 719.9                       | 0.29                   | 0.19                   | 4.5  | 3.5  |
| 720.1                       | 0.065                  | 0.077                  | 3.5  | 2.5  |
| 722.0                       | 0.21                   | 0.17                   | 5.5  | 4.5  |
| 722.4                       | 0.055                  | 0.076                  | 4.5  | 3.5  |
| 724.2                       | 0.14                   | 0.15                   | 6.5  | 5.5  |
| 724.6                       | 0.041                  | 0.071                  | 5.5  | 4.5  |
| 726.4                       | 0.086                  | 0.12                   | 7.5  | 6.5  |
| 726.9                       | 0.027                  | 0.063                  | 6.5  | 5.5  |

continued on next page

**TABLE II – continued from previous page**

| Freq<br>(cm <sup>-1</sup> ) | Rel. Int 38K<br>(a.u.) | Rel. Int 90K<br>(a.u.) | J'   | J''  |
|-----------------------------|------------------------|------------------------|------|------|
| 728.5                       | 0.048                  | 0.097                  | 8.5  | 7.5  |
| 729.1                       | 0.017                  | 0.053                  | 7.5  | 6.5  |
| 730.7                       | 0.024                  | 0.073                  | 9.5  | 8.5  |
| 731.3                       | 0.0091                 | 0.042                  | 8.5  | 7.5  |
| 732.9                       | 0.011                  | 0.054                  | 10.5 | 9.5  |
| 733.6                       | 0.0045                 | 0.032                  | 9.5  | 8.5  |
| 735.1                       | 0.0049                 | 0.038                  | 11.5 | 10.5 |
| 735.8                       | 0.0021                 | 0.023                  | 10.5 | 9.5  |
| 737.3                       | 0.0019                 | 0.025                  | 12.5 | 11.5 |
| 738.0                       | 8.4E-4                 | 0.016                  | 11.5 | 10.5 |
| 739.5                       | 6.9E-4                 | 0.016                  | 13.5 | 12.5 |
| 740.2                       | 3.2E-4                 | 0.011                  | 12.5 | 11.5 |
| 741.7                       | 2.3E-4                 | 0.010                  | 14.5 | 13.5 |
| 747.3                       | 0.017                  | 0.014                  | 4.5  | 4.5  |
| 748.1                       | 0.020                  | 0.021                  | 5.5  | 5.5  |
| 748.9                       | 0.018                  | 0.026                  | 6.5  | 6.5  |
| 749.9                       | 0.014                  | 0.029                  | 7.5  | 7.5  |
| 750.9                       | 0.0100                 | 0.030                  | 8.5  | 8.5  |
| 752.1                       | 0.0060                 | 0.028                  | 9.5  | 9.5  |
| 753.3                       | 0.0033                 | 0.025                  | 10.5 | 10.5 |
| 754.6                       | 0.0016                 | 0.021                  | 11.5 | 11.5 |
| 756.0                       | 6.8E-4                 | 0.016                  | 12.5 | 12.5 |
| 756.9                       | 0.018                  | 0.012                  | 4.5  | 3.5  |
| 757.4                       | 2.7E-4                 | 0.012                  | 13.5 | 13.5 |
| 759.8                       | 0.021                  | 0.017                  | 5.5  | 4.5  |
| 762.8                       | 0.020                  | 0.021                  | 6.5  | 5.5  |

continued on next page

**TABLE II – continued from previous page**

| Freq<br>(cm <sup>-1</sup> ) | Rel. Int 38K<br>(a.u.) | Rel. Int 90K<br>(a.u.) | J'   | J''  |
|-----------------------------|------------------------|------------------------|------|------|
| 765.9                       | 0.017                  | 0.024                  | 7.5  | 6.5  |
| 769.1                       | 0.012                  | 0.025                  | 8.5  | 7.5  |
| 772.4                       | 0.0079                 | 0.024                  | 9.5  | 8.5  |
| 775.8                       | 0.0045                 | 0.021                  | 10.5 | 9.5  |
| 779.3                       | 0.0023                 | 0.018                  | 11.5 | 10.5 |
| 782.9                       | 0.0011                 | 0.014                  | 12.5 | 11.5 |
| 786.5                       | 4.6E-4                 | 0.011                  | 13.5 | 12.5 |

## REFERENCES

- <sup>1</sup>R. N. Zare, *Angular Momentum* (Wiley, New York, 1988).
- <sup>2</sup>M. C. V. Vroonhoven and G. C. Groenenboom, “Reassignment of the O<sub>2</sub> spectrum just below dissociation threshold based on *ab initio* calculations,” *J. Chem. Phys.* **117**, 5240–5251 (2002).
- <sup>3</sup>D. Papoušek and M. Aliev, *Rotation and Vibrational-Rotational Spectra* (Elsevier, Amsterdam, 1982).
- <sup>4</sup>S.-J. Tang, Y.-C. Chou, J. J.-M. Lin, and Y.-C. Hsu, “The bending vibrational levels of the acetylene cation: A case study of the Renner-Teller effect in a molecule with two degenerate bending vibrations,” *J. Chem. Phys.* **125**, 133201 (2006).
